# Supplementary material for: Aetiology of extracranial carotid free-floating thrombus in a prospective multicentre cohort
Source: HighWire-hosted journal article supplement (doi:10.1136/svn-2022-001639), 2022-11-11
Supplement: svn-2022-001639supp001_data_supplement.pdf [file svn-2022-001639supp001_data_supplement.pdf]

**Supplemental Table:** Underlying etiology of carotid free-floating thrombus.

| <b>Etiology</b>                                | <b>N (%)</b> | <b>Degree of underlying stenosis</b>                                  |
|------------------------------------------------|--------------|-----------------------------------------------------------------------|
| Atherosclerotic plaque                         | 66 (79.5%)   | 33/66 $\geq$ 50% stenosis<br>32/66 < 50% stenosis<br>1/66 occlusion   |
| Atherosclerotic plaque and atrial fibrillation | 10 (12.0%)   | 7/10 $\geq$ 50% stenosis<br>2/10 < 50% stenosis<br>1/10 ICA occlusion |
| Carotid dissection                             | 4 (4.8%)     | 1/4 $\geq$ 50% stenosis<br>3/4 < 50% stenosis                         |
| ESUS                                           | 3 (3.6%)     | n/a                                                                   |

ICA = internal carotid artery, ESUS = embolic stroke of uncertain source
